# Supplementary material for: Coal derived porous carbon fibers with tunable internal channels for flexible electrodes and organic matter absorption
Source: Royal Society of Chemistry journal article supplement (doi:10.1039/c5ta05743d), 2015-01-01
Supplement: c5ta05743d1.pdf [file c5ta05743d1.pdf]

## Coal derived porous carbon fibers with tunable internal channel for flexible electrodes and organic matter absorption

Mingxi Guo, Jixi Guo, Dianzeng Jia,\* Hongyang Zhao, Zhipeng Sun, Xianli Song, Yinhua, Li

Key laboratory of material and technology for clean energy, ministry of education; Key laboratory of advanced functional materials, autonomous region; Institute of Applied Chemistry, Xinjiang University, Urumqi 830046, Xinjiang, P. R. China. Tel.: +86-991-8583083; Fax: +86-991-8588883; E-mail address: [jdz0991@gmail.com](mailto:jdz0991@gmail.com)

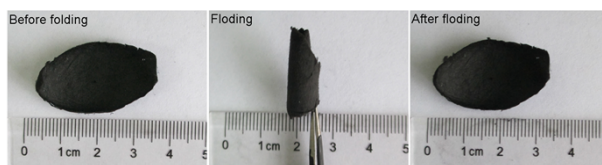

Fig. S1 Photograph of CPCFs as flexible material.

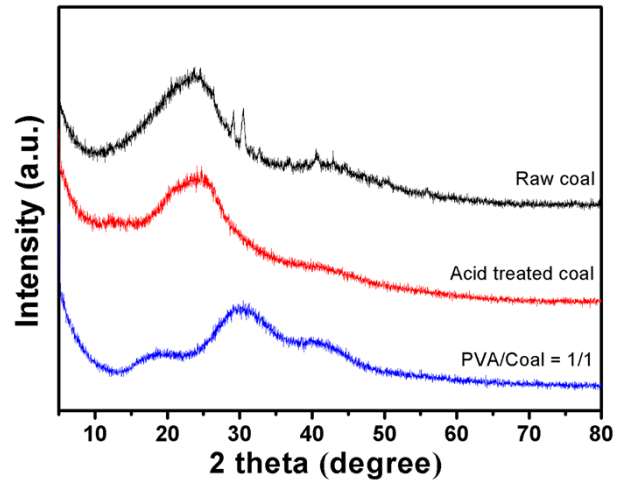

Fig. S2 XRD patterns of raw coal, acid treated coal and CPCFs (PVA/Coal = 1/1).

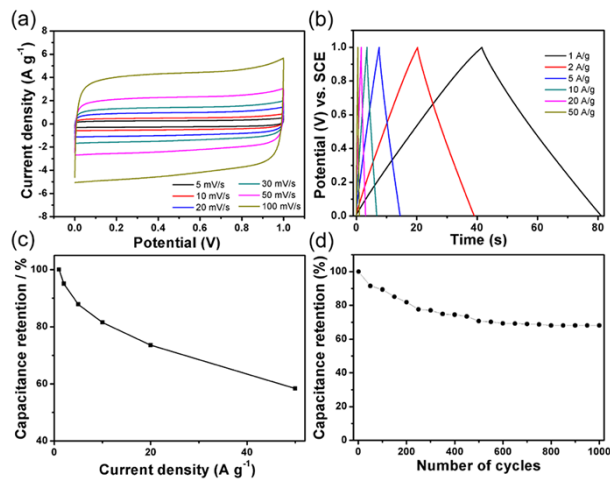

Fig. S3 Electrochemical performance of PVA/Coal = 1/1 carbon fiber measured in 6 M KOH electrolyte in two-electrode system. (a) CV profiles. (b) Galvanostatic charge-discharge profiles. (c) Capacitance retention and (d) cyclic performance of CPCFs at a current density of 1 A g<sup>-1</sup>.

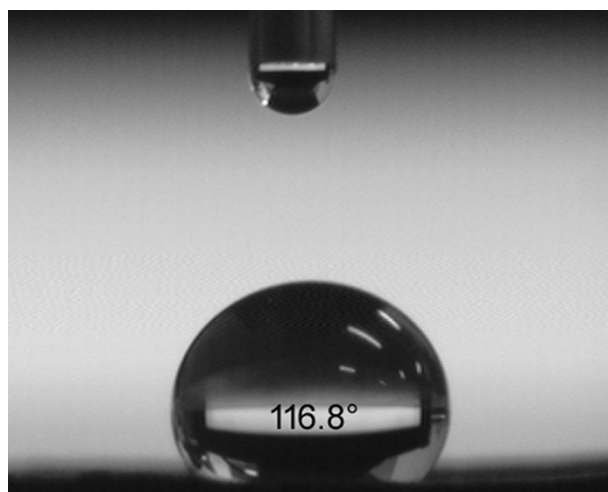

Fig. S4 The water contact angle of CPCFs.
